# Supplementary material
Source: PubMed Central journal article supplement (PMC1892946)

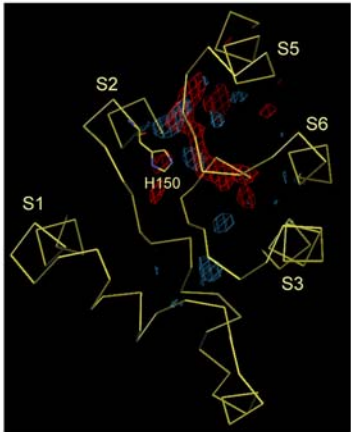

Supplement: pnas_0611080104_1.pdf [file pnas_0611080104_1.pdf]

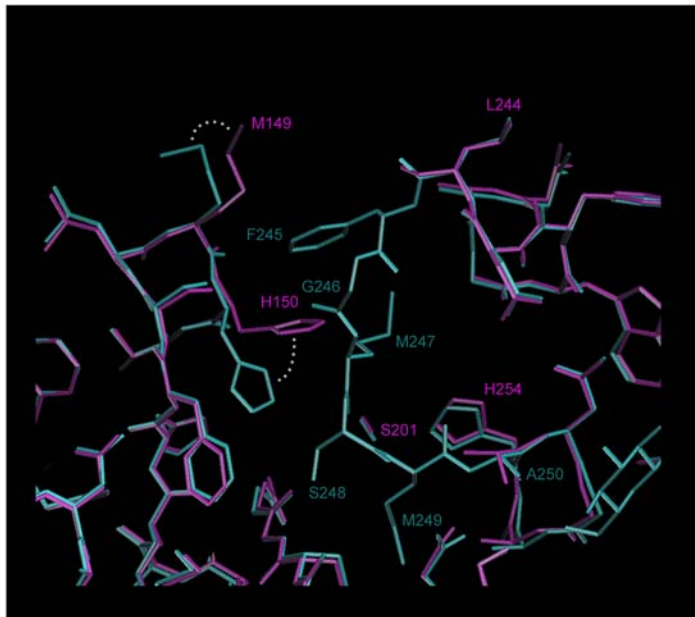

Supplement: pnas_0611080104_2.pdf [file pnas_0611080104_2.pdf]

closed

(L3)

(L5)

S248

L244

F245

M149

(S5)

W236

F153

(S2)

open

(L3)

L244

H254

H150

S201

M149

(S5)

W236

F153

(S2)

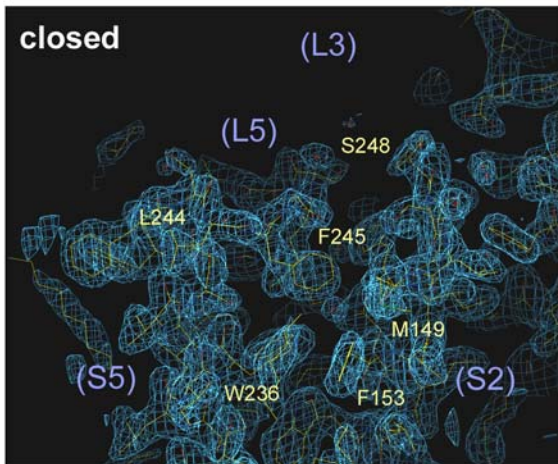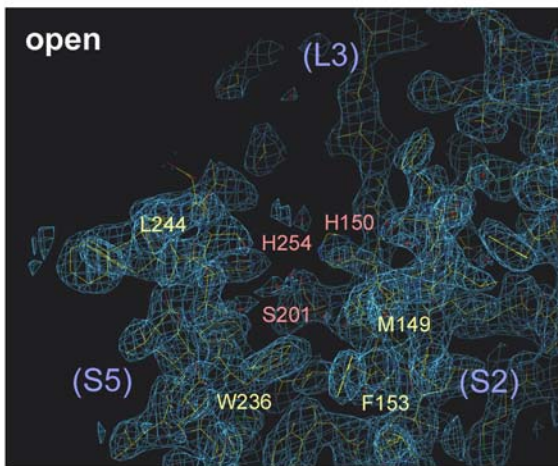

Supplement: pnas_0611080104_3.pdf [file pnas_0611080104_3.pdf]

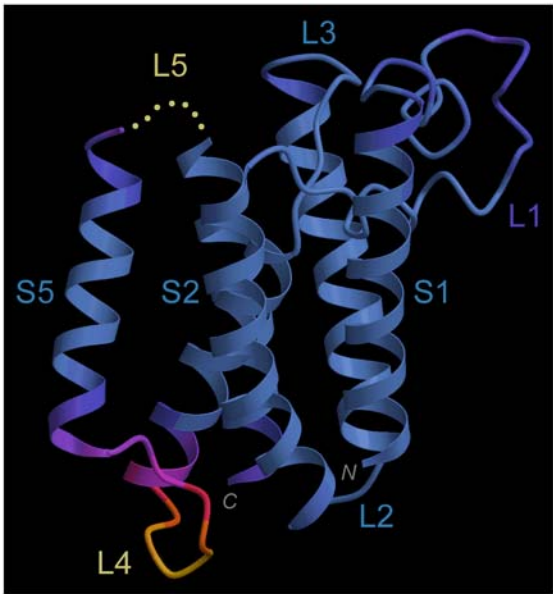

Supplement: pnas_0611080104_4.pdf [file pnas_0611080104_4.pdf]
